# Supplementary material for: Switchable thiophene coordination in Ru(ii) bipyridyl phosphinoterthiophene complexesElectronic supplementary information (ESI) available: synthetic details and characterization data for all complexes. See http://www.rsc.org/suppdata/cc/b2/b209035j/
Source: Royal Society of Chemistry journal article supplement (doi:10.1039/b209035j), 2002-11-19
Supplement: b209035j.doc [file b209035j.doc]

Supplementary information

Switchable thiophene coordination in Ru(II) bipyridyl phosphinoterthiophene complexes

Carolyn Moorlag, Olivier Clot, Michael O. Wolf,* and Brian O. Patrick

Department of Chemistry, University of British Columbia, 2036 Main Mall, Vancouver, Canada, V6T 1Z1

Synthesis of **1a**: two equivalents of AgBF4 were added to a deaerated acetone solution of Ru(bpy)2Cl2·2H2O, stirred for 18 h and filtered. To the red filtrate was added 1.05 equivalents of 3´-(diphenylphosphino)-2,2':5'2''-terthiophene (dppterth) and the mixture was heated to reflux for 24 h. The resulting solution was condensed and metathesised to the PF6 salt to yield [Ru(bpy)2(dppterth-*P,S*)](PF6)2 (**1a**) which was purified by recrystallization in 9:1 ethanol-acetone to yield bright yellow crystals (60% yield). 1H NMR (300.1 MHz, CO(CD3)2):  9.01 (d, *J* = 5.7 Hz, 1H), 8.91 (d, *J* = 5.4 Hz, 1H), 8.71-8.58 (m, 4H), 8.27-8.18 (m, 3H), 8.11 (t, *J* = 7.8 Hz, 1H), 7.89 (d, *J* = 6.0 Hz, 1H), 7.80-7.78 (m, 1H), 7.66-7.49 (m, 6H), 7.44-7.33 (m, 7H), 7.22-7.16 (m, 2H), 7.08 (dd, *J* = 4.4 Hz, *J* = 3.6 Hz, 1H), 7.06-7.01 (m, 2H), 7.04 (s, 1H), 6.93-8.89 (m, 2H); 31P NMR (121.5 MHz, CO(CD3)2):  29.1 (s), -143.0 (septet, 1*J*PF = 708 Hz, PF6). Elemental analysis: calcd. for C44H33F12N4S3P3Ru: C, 46.52; H, 2.93; N, 4.93; found: C, 46.84; H, 2.97; N, 4.68%.

Synthesis of **2a**: two equivalents of AgBF4 were added to a deaerated acetone solution of Ru(bpy)2Cl2·2H2O, stirred for 18 h and filtered. To the red filtrate was 1.05 equivalents of 4,4'-dimethyl-3´-(diphenylphosphino)-2,2':5'2''-terthiophene (Me2-dppterth) and the mixture was heated to reflux for 24 h. The resulting solution was condensed and metathesised to the PF6 salt to yield [Ru(bpy)2(Me2-dppterth-*P,S*)](PF6)2 (**2a**) which was purified by recrystallization in 9:1 ethanol-acetone to yield bright yellow crystals (52% yield). 1H NMR (300.1 MHz, CO(CD3)2):  9.14 (d, *J* = 5.7 Hz, 1H), 8.84 (d, *J* = 5.0 Hz, 1H), 8.79 (d, *J* = 8.7 Hz, 1H), 8.69 (q, 2H), 8.61 (d, *J* = 8.4 Hz, 1H), 8.30-8.23 (m, 3H), 8.10 (t, *J* = 8.0 Hz, 1H), 7.98 (d, *J* = 5.4 Hz, 1H), 7.84-7.82 (m, 1H), 7.70 (t, *J* = 6.8 Hz, 1H), 7.63-7.49 (m, 4H), 7.46-7.35 (m, 5H), 7.23-7.17 (m, 3H), 7.12 (d, *J* = 3.3 Hz, 1H), 6.94-6.88 (m, 2H), 6.79-6.77 (m, 2H), 6.78 (s, 1H), 2.44 (s, 3H), 1.48 (s, 3H); 31P NMR (121.5 MHz, CO(CD3)2):  29.0 (s), -143.0 (septet, 1*J*PF = 708 Hz, PF6). Elemental analysis: calcd. for C46H37F12N4S3P3Ru: C, 47.47; H, 3.20; N, 4.81; found: C, 47.54; H, 3.38; N, 4.47%.

Synthesis of **1b**: complex **1a** was dissolved in acetonitrile and 10 equivalents of NaOH in 1 M solution were added. The mixture was stirred at reflux for 18 hours, then condensed and [Ru(bpy)2(dppterth-*P,C*)](PF6)2 (**1b**) was precipitated from NH4PF6 aqueous solution. Column chromatography followed by recrystallization in acetone/hexanes yielded dark red crystals (50% yield). 1H NMR (300.1 MHz, CO(CD3)2):  8.87 (d, *J* = 5.7 Hz, 1H), 8.57 (d, *J* = 8.1 Hz, 1H), 8.51 (d, *J* = 8.1 Hz, 1H), 8.47-8.42 (m, 3H), 8.07 (dd, *J* = 8.0 Hz, *J* = 1.9 Hz, 1H), 7.98-7.85 (m, 3H), 7.77-7.64 (m, 4H), 7.52-7.39 (m, 5H), 7.36 (dd, *J* = 4.8 Hz, *J* = 1.3 Hz, 1H), 7.26 (td, *J* = 6.8 Hz, *J* = 1.4 Hz, 1H), 7.18 (dd, *J* = 3.9 Hz, *J* = 1.3 Hz, 1H), 7.12 (td, *J* = 7.2 Hz, *J* = 1.4 Hz, 1H), 7.06-7.02 (m, 2H); 6.93-6.89 (m, 3H), 6.65 (d, *J* = 2.7 Hz, 1H), 6.52-6.47 (m, 2H), 6.38 (d, *J* = 8.1 Hz, 1H); 31P NMR (121.5 MHz, CO(CD3)2):  46.7 (s), -143.0 (septet, 1*J*PF = 708 Hz, PF6). Elemental analysis: calcd. for C44H32F6N4S3P2RuC3H6O: C, 53.86; H, 3.65; N, 5.35; found: C, 53.89; H, 3.41; N, 5.34%.

Synthesis of **2b**: complex **2a** was dissolved in acetonitrile and 10 equivalents of NaOH in 1 M solution were added. The mixture was stirred at reflux for 18 hours, then condensed and [Ru(bpy)2(Me2-dppterth-*P,S*)](PF6)2 (**2b**) was precipitated from NH4PF6 aqueous solution. Column chromatography followed by recrystallization in acetone/hexanes yielded dark red crystals (10% yield). 1H NMR (300.1 MHz, CO(CD3)2): 8.85 (d, *J* = 5.7 Hz, 1H), 8.57 (d, *J* = 7.8 Hz, 1H), 8.52 (d, *J* = 8.1 Hz, 1H), 8.44-8.37 9m, 3H), 8.05 (dd, *J* = 8.0 Hz, *J* = 1.5 Hz, 1H), 7.96-7.84 (m, 4H), 7.70-7.62 (m, 3H), 7.47-7.38 (m, 4H), 7.27-7.10 (m, 4H), 6.93-6.88 (m, 3H), 6.70 (dd, *J* = 3.3 Hz, *J* = 1.3 Hz, 1H), 6.51-6.46 (m, 3H), 6.07 (d, *J* = 1.3 Hz, 1H), 6.52-6.47 (m, 2H), 6.38 (d, *J* = 8.1 Hz, 1H); 31P NMR (121.5 MHz, CO(CD3)2): 46.5 (s), -143.0 (septet, 1*J*PF = 708 Hz, PF6). Elemental analysis: calcd. for C46H36F6N4S3P2RuC3H6O: C, 54.69; H, 3.93; N, 5.21; found: C, 54.96; H, 3.60; N, 5.22%.
